# Supplementary material
Source: publisher site journal article supplement (https://www.spandidos-publications.com/3830/downloadSupplementary)

Figure S1. Expression level change of miR-152-3p, NCAM1 and DNMT3B after transfection. (A) A total of 48 h after transfection with miR-152-3p mimics or inhibitor, the expression of miR-152-3p increased significantly with miR-152-3p mimics, while miR-152-3p inhibitor decreased the expression of miR-152-3p. (B) mRNA expression level of NCAM1 after transfection with NCAM1 overexpression plasmid in A549 cells. (C) mRNA expression level of DNMT3B after sh-DNMT3B transfection in A549 cells. \*\* $P < 0.01$ , \*\*\* $P < 0.001$ , \*\*\*\* $P < 0.0001$ . DNMT, DNA methyltransferase; miR, microRNA; NC, negative control; NCAM1, neural cell adhesion molecule 1; sh, short hairpin; Con, control; OE, overexpression.

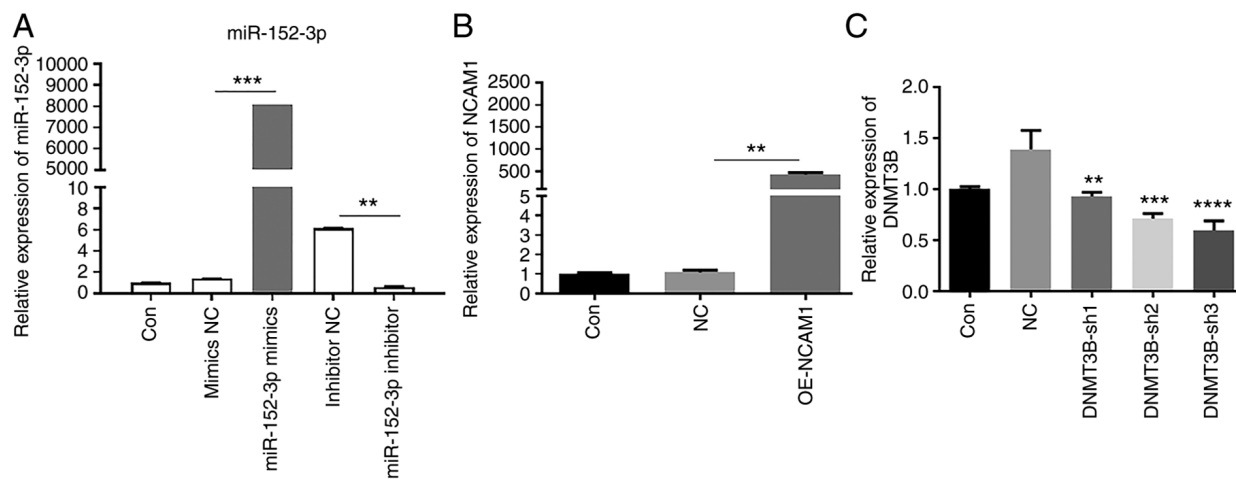

Figure S2. Transfection rate of 293T, A549 and A549/DDP cells with Lipofectamine® 3000. The left columns indicate the cell transfection rate 48 h after transfection and the right columns that at 72 h after transfection, observed under a fluorescence microscope (magnification, x100). With the extension of transfection time, the transfection efficiency increased.

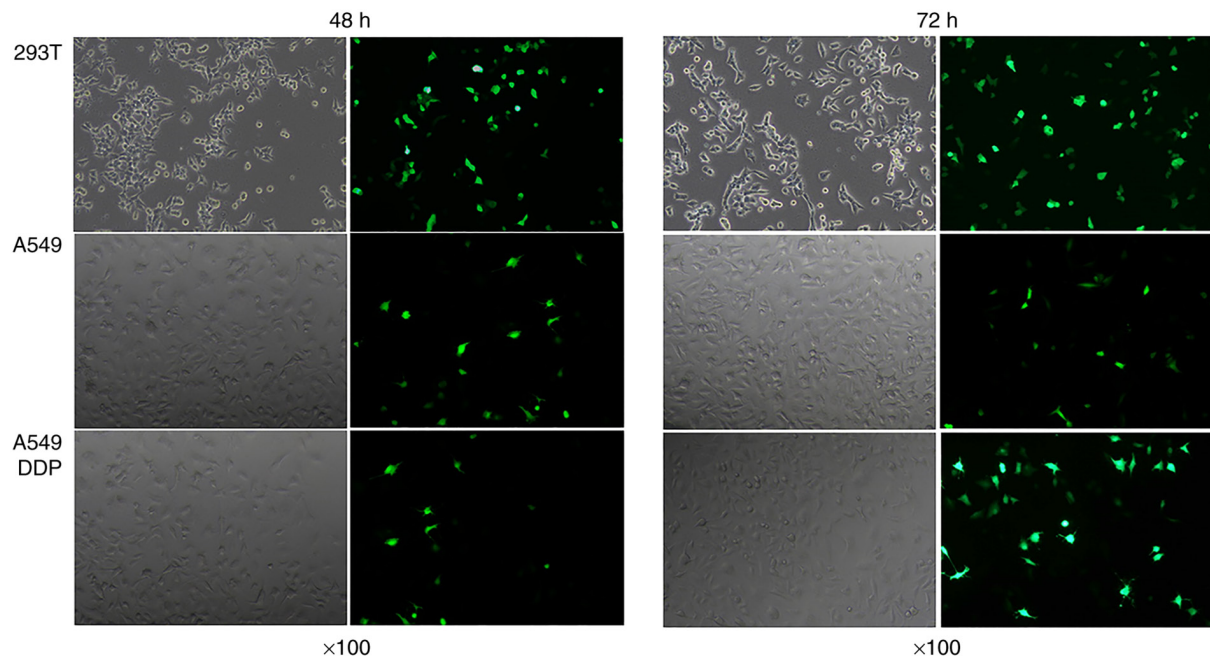

Supplement: Supplementary file 1 [file downloadSupplementary]
